# Supplementary material
Source: PubMed Central journal article supplement (PMC6662159)
Supplement: NIHMS1038483-supplement-supp.pdf [file NIHMS1038483-supplement-supp.pdf]

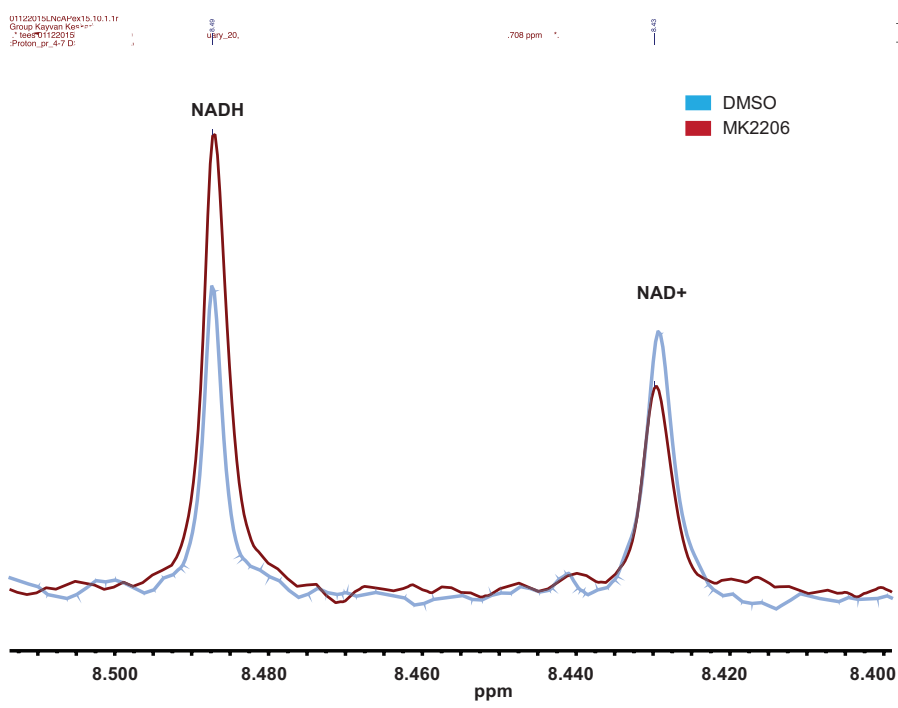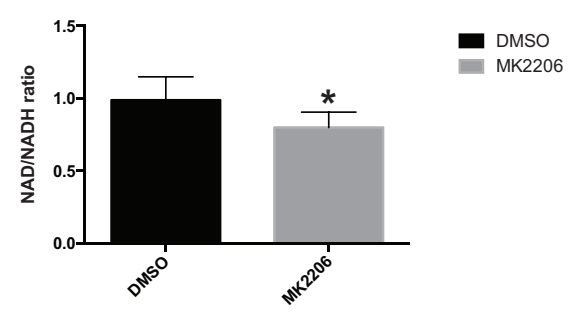

Time (hr)      2    24    2    6    24  
MK2206        —    —    +    +    +

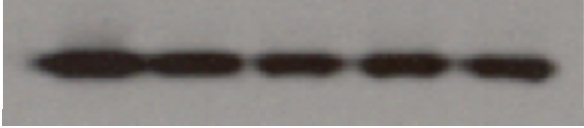

Glut-1

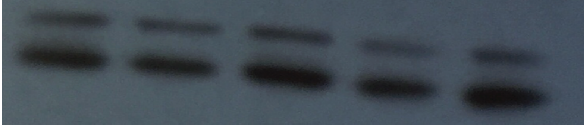

HK-II

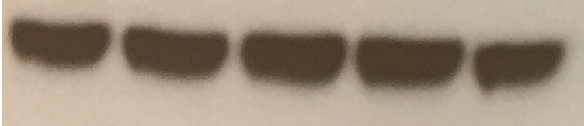

PFK-A

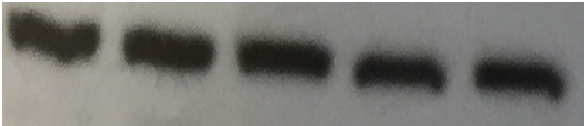

Enolase

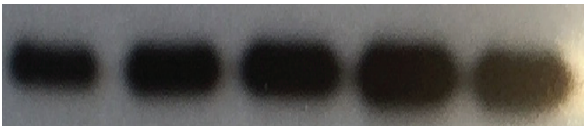

PKM2

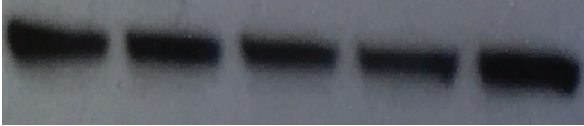

Glutaminase

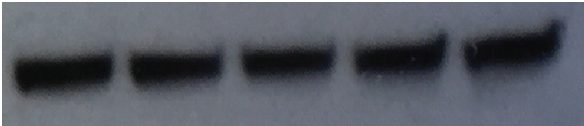

LDH-A

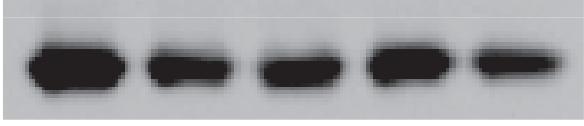

LDH-B

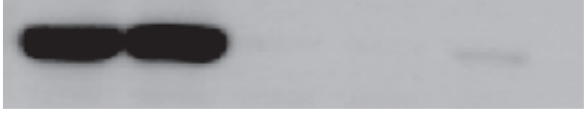

p-AKT (Ser473)

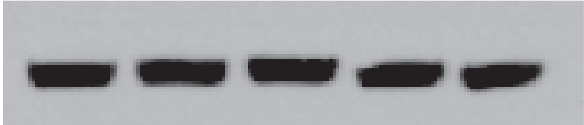

pan-AKT

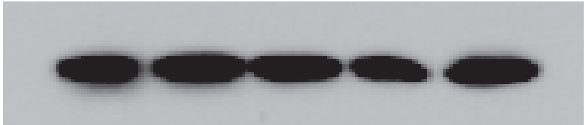

Actin

DMSO

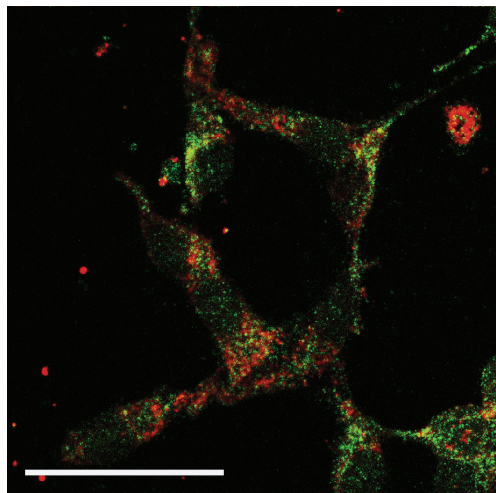

MK2206

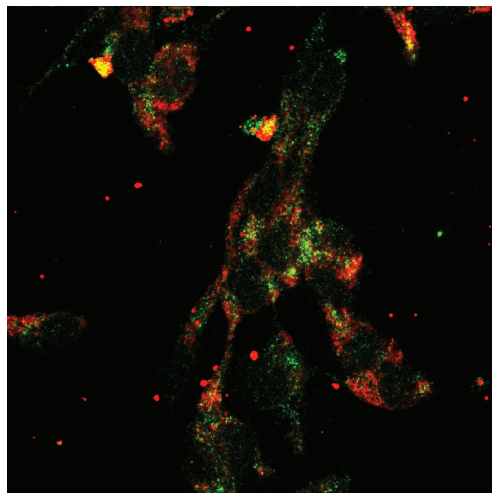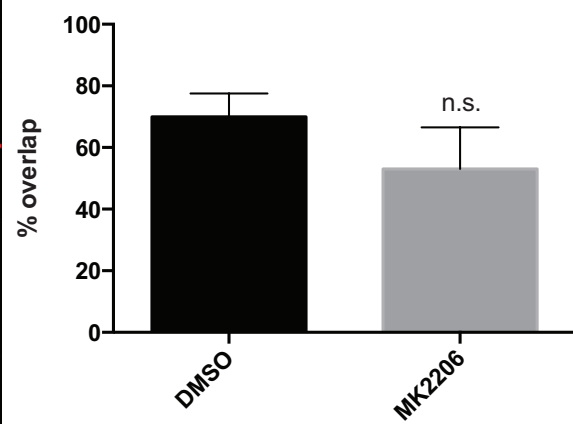

DMSO

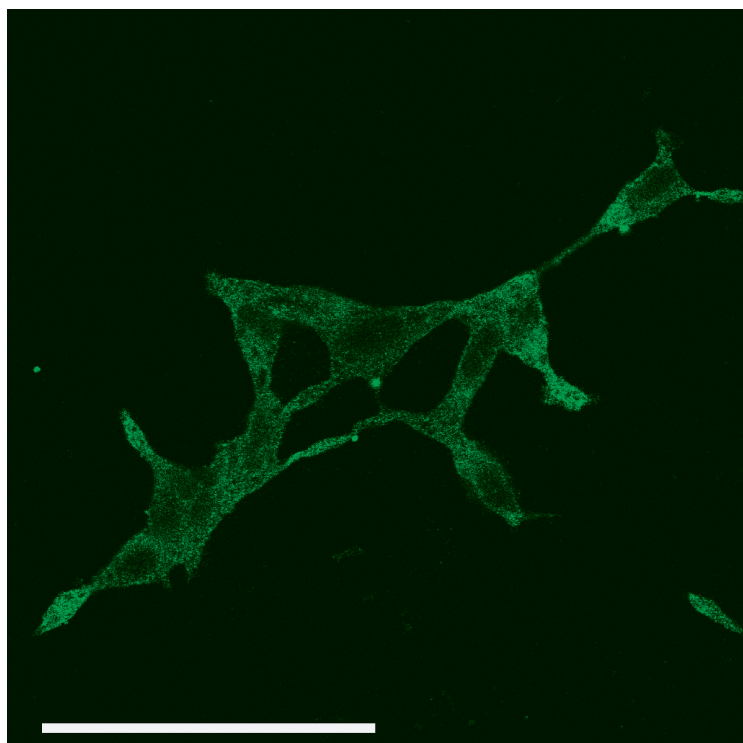

MK2206

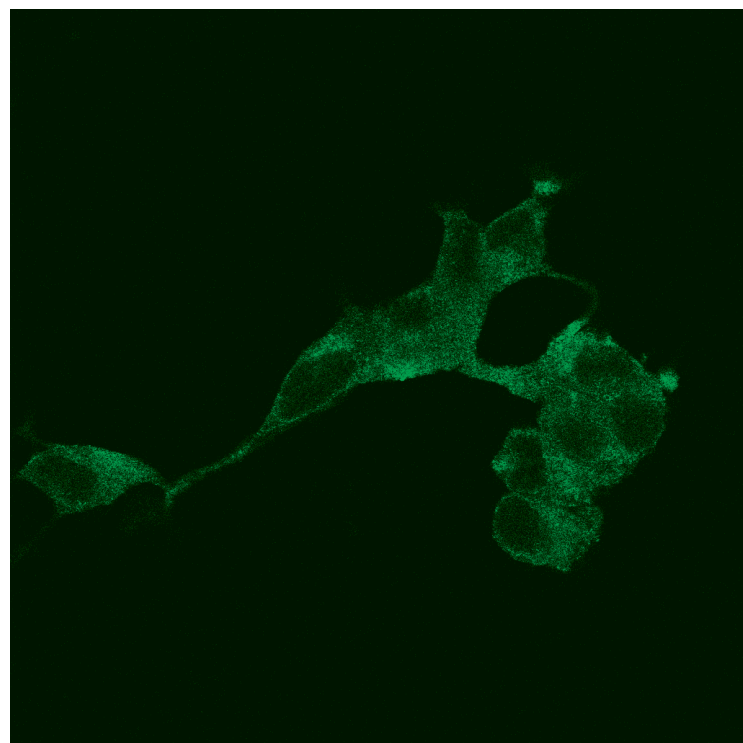



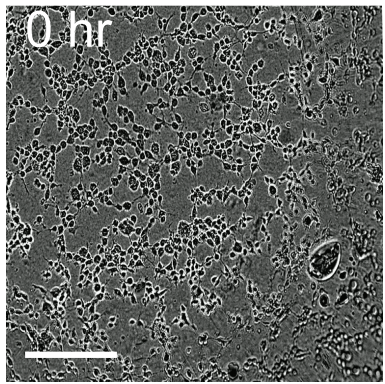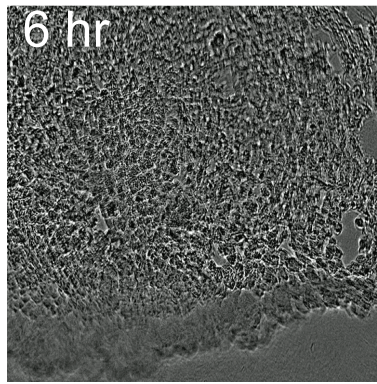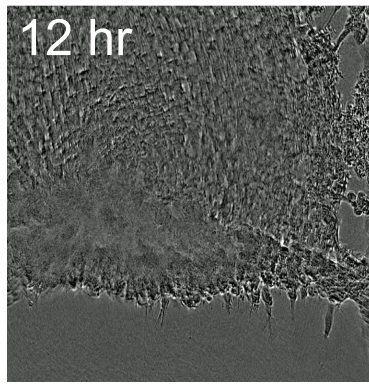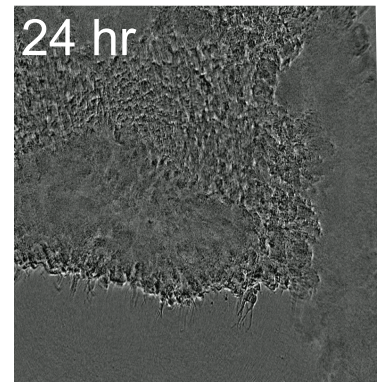

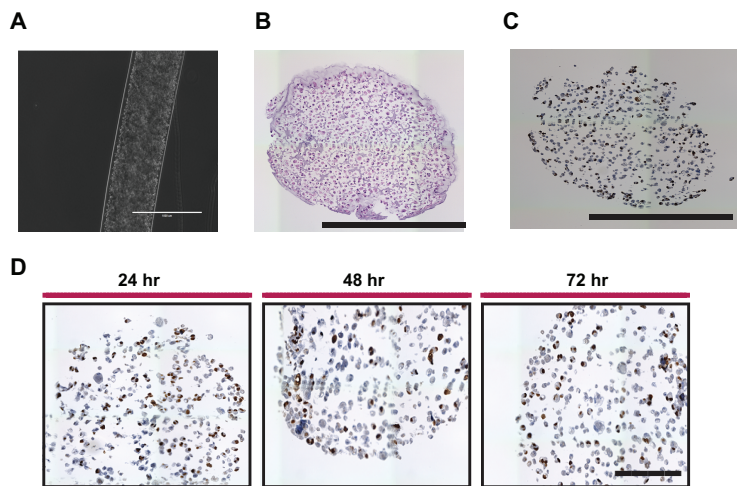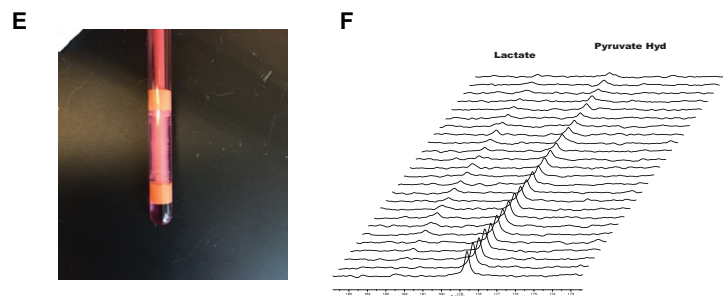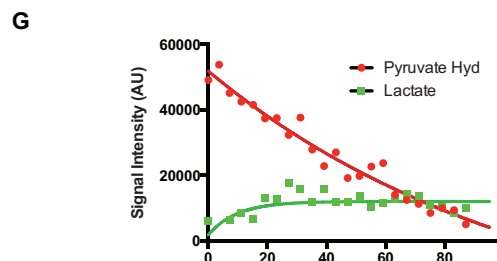

Fig 1: (A) Bright-field image of an alginate thread in culture and (B) H&Estainof the same thread and (C) another cross-section stained with Ki-67. (D) Representative images of an alginate thread cultured in a rotating plate over a period of 4 days and stained with Ki67 All scale bars represent 500um.

## Supplemental Figure Captions

**Supp. Figure 1. Proton NMR spectra of LnCAP cell extracts treated either with DMSO or 1 $\mu$ M MK2206 for 24 hr.** Co-factor concentrations were quantified as a ratio between the resonance for the lone hydrogen atom on the five membered ring of the adenine moiety in NAD<sup>+</sup> that resonates at 8.435 ppm and NADH at 8.486 ppm. Extractions of cells were performed as described in the materials section.

**Supp. Figure 2. Western blot of metabolic proteins in LnCAP cells.**

**Supp. Figure 3. Co-localization analysis of HKII and CoxIV.** LnCAP cells were grown on coverslips, fixed and permeabilized for detection of HKII and CoxIV, coupled to Alexa488 and Alexa594 secondary antibodies respectively. Co-localization analysis was performed by the MSKCC Molecular Cytology Core using the ImageJ software. Scale bar = 100 $\mu$ m

**Supp. Figure 4. Immunofluorescence of Glut-1.** LnCAP cells were grown on coverslips, fixed and permeabilized for detection of Glut-1 coupled to Alexa488. Scale bar = 100  $\mu$ m

**Supp. Figure 5. Time-lapse images of spheroid formation.** LnCAP cells were grown on a 1:1 mixture of sodium alginate and matrigel in ultra-low adhesion 96-well plates. Time-lapse images were acquired using a 10X objective on the Incucyte cell imager platform located in a humidified cell culture chamber. Scale bar = 1mm

**Supp. Figure 6. Hyperpolarized MRS of sodium alginate thread cultures.** (A) Bright-field image of an alginate thread in culture and (B) H&E stain of the same thread and (C) another cross-section stained with Ki-67. (D) Representative images of an alginate thread cultured in a rotating plate over a period of 4 days and stained with Ki67 All scale bars represent 500  $\mu$ m. (E) Thread cultures wound on a custom-printed 3D insert, directly deposited into a 5mm NMR tube metabolizes hyperpolarized [ $1\text{-}^{13}\text{C}$ ] pyruvate to lactate after injection of 1mM hyperpolarized pyruvate (F). Quantification of integrals of the lactate and pyruvate hydrate peaks over time (G).
